# Supplementary material
Source: publisher figshare collection journal article supplement (https://rs.figshare.com/ndownloader/files/13114634)
Supplement: Supplementary file 1 [file 13114634]

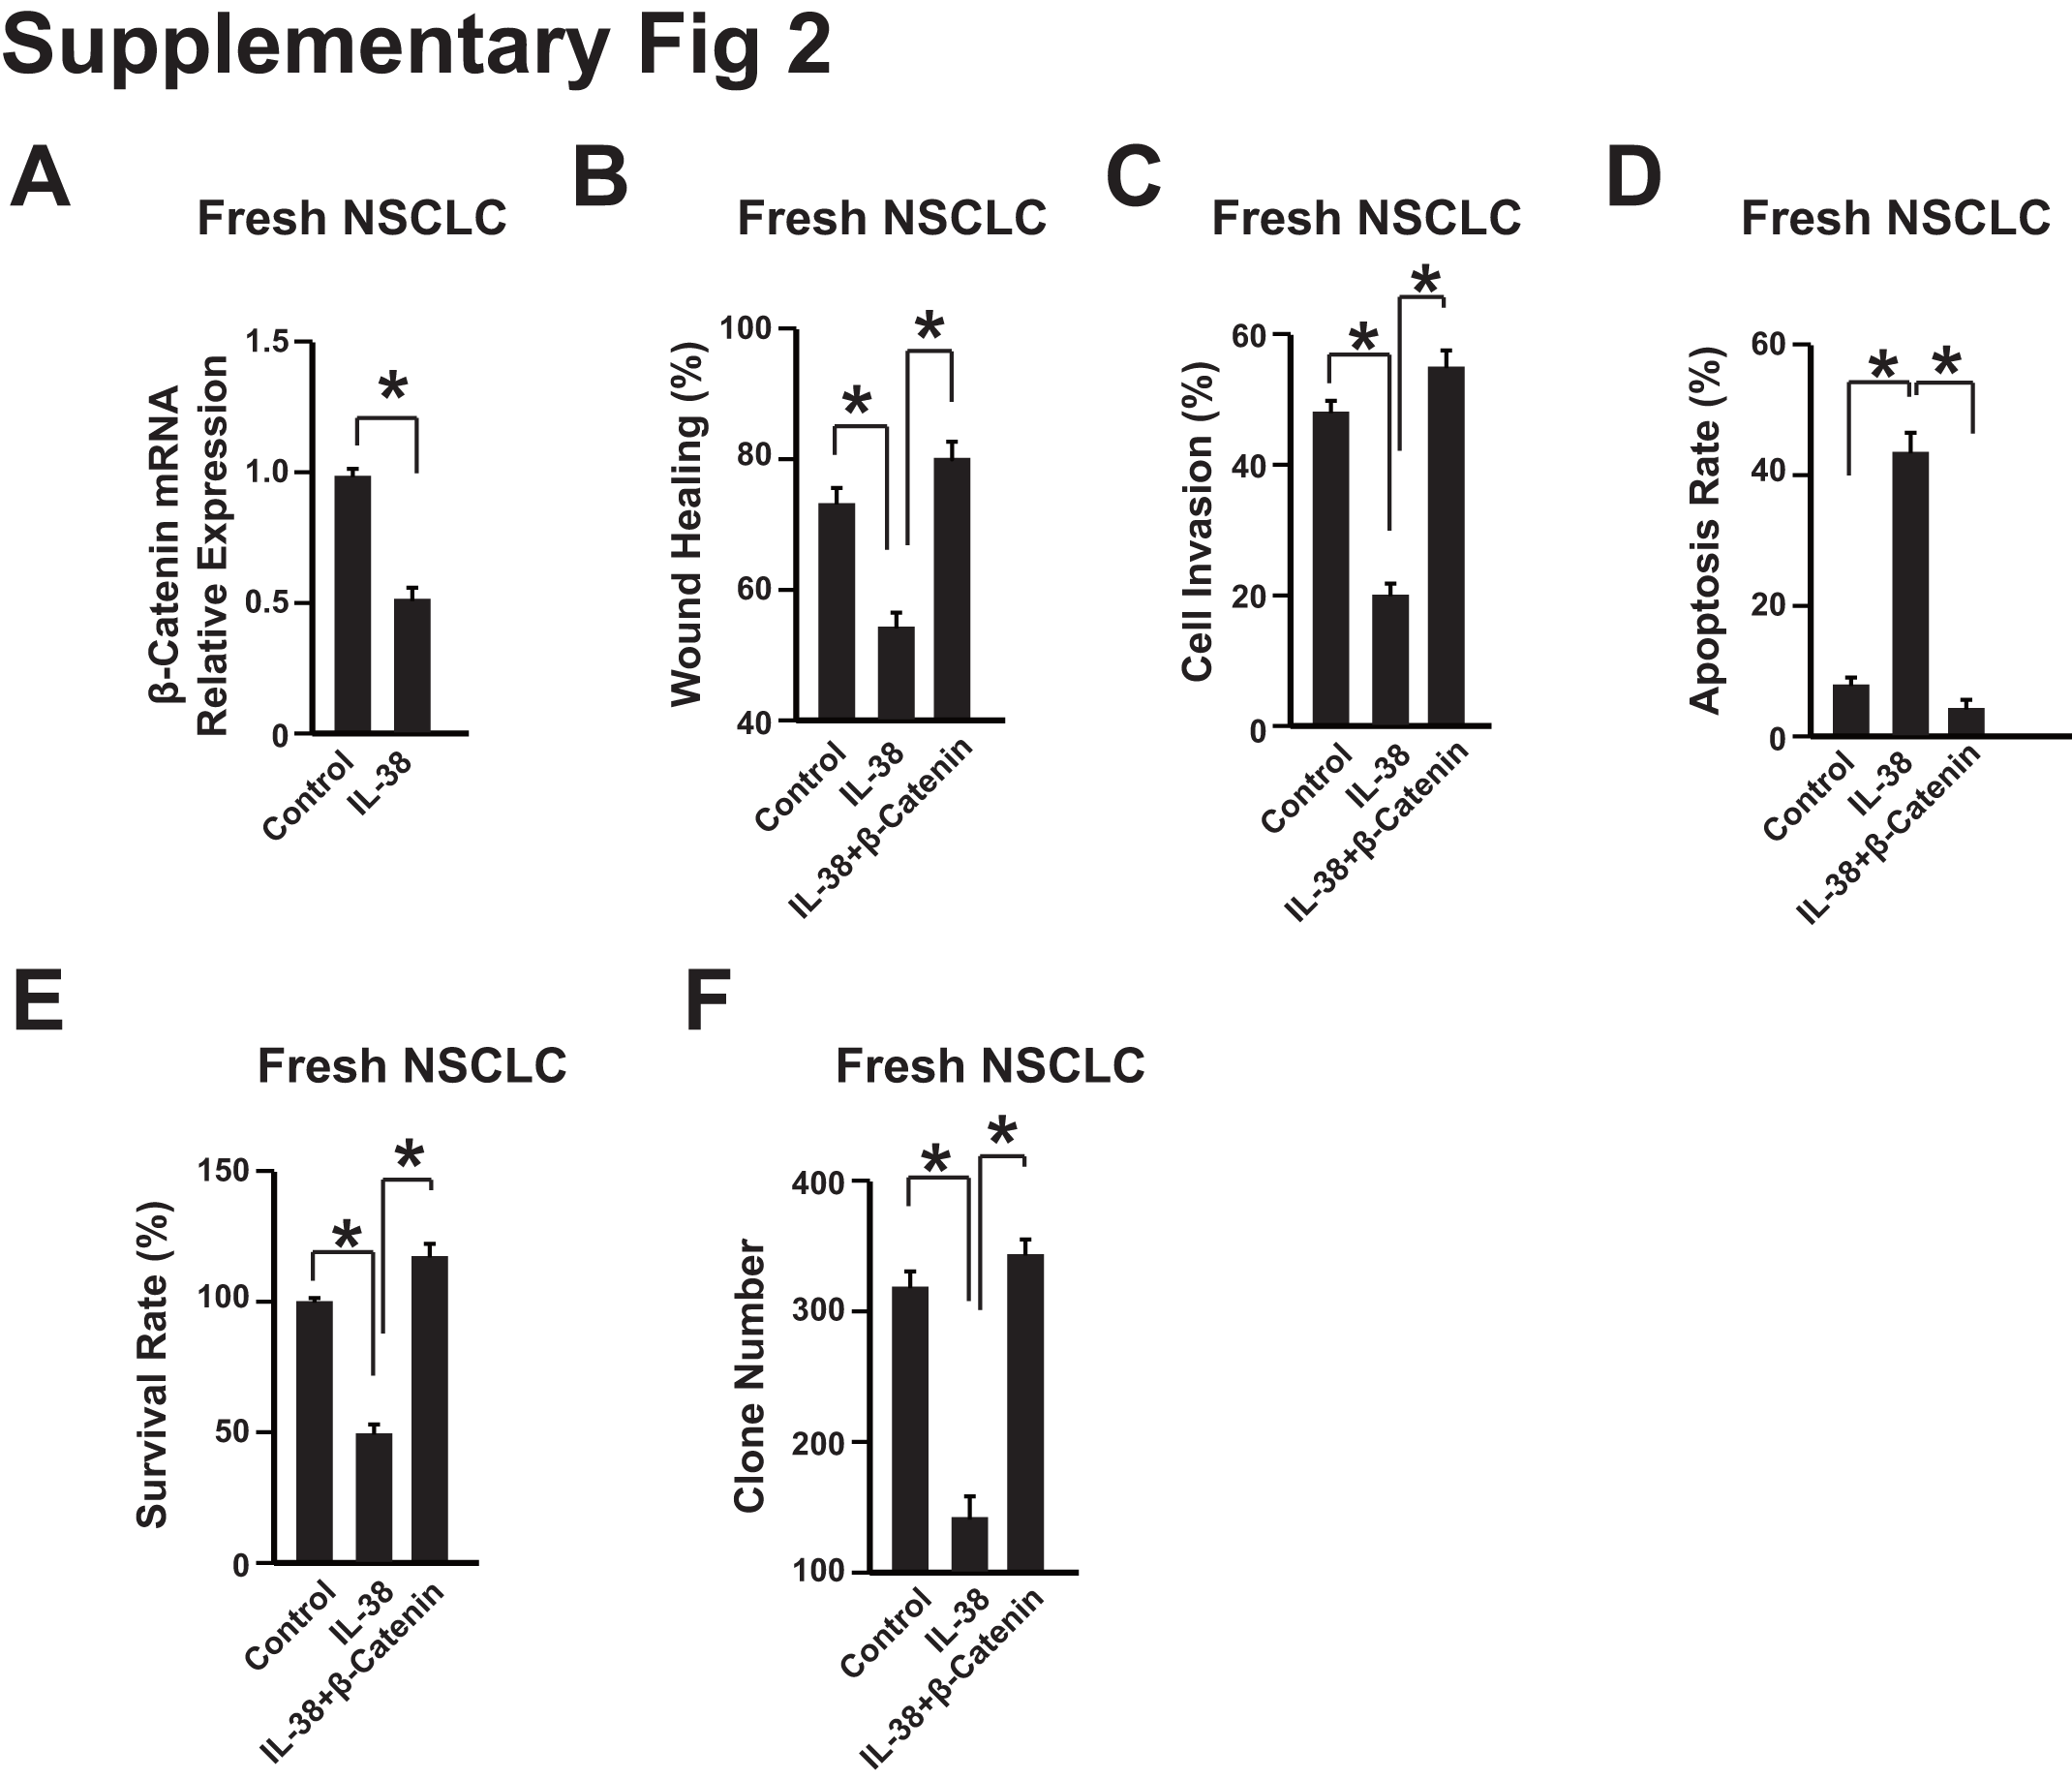


**Figure S2**. IL-38 inhibits β-catenin expression in freshly isolated NSCLC cells. (**A**) The mRNA level of β-catenin was measured by qPCR. Freshly isolated NSCLC cells were treated with 100 ng/mL rhIL-38. n = 3. * *P*<0.05. (**B-G**) The wound healing, cell invasion, apoptosis, survival rate, and clone formation capability of cells overexpressing IL-38, β-catenin, both IL-38 and β-catenin or empty vector were analyzed in freshly isolated NSCLC cells. n = 3. * *P*<0.05.
